# Supplementary material for: Shouldering our Way into a More Meaningful Research Agenda for Atraumatic Shoulder Pain: A Priority Setting Study
Source: bioRxiv or medRxiv preprint supplement (doi:10.1101/2024.08.22.24312355), 2024-08-22
Supplement: Supplementary file [file media-2.pdf]

Table 1. Participants’ Characteristics

|                                                                           | No. (%) of participants                          |                                           |                             |                             |
|---------------------------------------------------------------------------|--------------------------------------------------|-------------------------------------------|-----------------------------|-----------------------------|
|                                                                           | Total n = 608                                    |                                           |                             |                             |
|                                                                           | Collecting research questions<br>n = 297 (48.8%) | Interim Prioritisation<br>n = 290 (47.6%) | Workshop 1<br>n = 11 (1.8%) | Workshop 2<br>n = 10 (1.6%) |
| Table 1. Participant Characteristics                                      |                                                  |                                           |                             |                             |
| Participants (% of sub-sample)                                            |                                                  |                                           |                             |                             |
| Person living with chronic MSK pain                                       | 230 (77.4)                                       | 147 (50.6)                                | -                           | 8 (80)                      |
| Career to a person living with chronic MSK pain                           | 1 (0.3)                                          | 8 (2.7)                                   | -                           | 2 (20)                      |
| Medical Doctor                                                            | 20 (6.7)                                         | 25 (8.6)                                  | 4 (36.3)                    | -                           |
| Physiotherapist                                                           | 30 (10.1)                                        | 97 (33.4)                                 | 3 (27.2)                    | -                           |
| Other HCPs (Psychologist, Nurse, Chiropractor, Social worker, Researcher) | 16 (5.3)                                         | 13 (4.4)                                  | 4 (36.3)                    | -                           |
| Sex                                                                       |                                                  |                                           |                             |                             |
| Female                                                                    | 177 (59.5)                                       | 147 (50.7)                                | 6 (54.5)                    | 4 (40)                      |
| Male                                                                      | 120 (40.5)                                       | 143 (49.3)                                | 5 (45.4)                    | 6 (60)                      |
| Age                                                                       |                                                  |                                           |                             |                             |
| 18-30                                                                     | 26 (8.7)                                         | 51 (17.5)                                 | 1 (9.0)                     | 1 (10)                      |
| 31-40                                                                     | 65 (21.8)                                        | 57 (19.6)                                 | 5 (54.5)                    | 2 (20)                      |
| 41-50                                                                     | 83 (27.9)                                        | 81 (27.9)                                 | 3 (27.2)                    | 3 (30)                      |
| 51-60                                                                     | 79 (26.5)                                        | 60 (20.6)                                 | 1 (9.0)                     | 2 (20)                      |
| 61-70                                                                     | 33 (11.1)                                        | 29 (10)                                   | 1 (9.0)                     | 1 (10)                      |
| 71-80                                                                     | 3 (1.0)                                          | 7 (2.4)                                   | -                           | 1 (10)                      |
| 80+                                                                       | 8 (2.6)                                          | 5 (1.7)                                   | -                           | -                           |
| Region                                                                    |                                                  |                                           |                             |                             |
| Region of Northern Jutland                                                | 64 (21.5)                                        | 61 (21.0)                                 | 2 (18.1)                    | 2 (20)                      |
| Region Central Denmark                                                    | 60 (20.2)                                        | 93 (32.0)                                 | 2 (18.1)                    | 1 (10)                      |
| Region Southern Denmark                                                   | 58 (19.5)                                        | 51 (17.5)                                 | 2 (18.1)                    | 3 (30)                      |

|                                                                                |            |            |          |        |
|--------------------------------------------------------------------------------|------------|------------|----------|--------|
| Region Zealand                                                                 | 56 (18.5)  | 22 (7.5)   | 2 (18.1) | 3 (30) |
| Region Capital                                                                 | 59 (19.8)  | 58 (20)    | 3 (27.2) | 1 (10) |
| <b>Ethnicity</b>                                                               |            |            |          |        |
| Danish                                                                         | 250 (84.1) | 266 (91.7) | 9 (81.8) | 3 (30) |
| Immigrant, non-western                                                         | 12 (4.0)   | 5 (1.7)    | 1 (9.0)  | 1 (10) |
| Immigrant, western                                                             | 2 (0.6)    | -          | 1 (9.0)  | 2 (20) |
| Descendant, non-western                                                        | 1 (0.3)    | -          | -        | 2 (20) |
| Descendant, western                                                            | 18 (6.0)   | 2 (0.6)    | -        | 2 (20) |
| Do not want to state                                                           | 14 (4.7)   | 17 (5.8)   | -        | -      |
| <b>Work Situation (People living with Atraumatic Shoulder Pain)</b>            |            |            |          |        |
| Student                                                                        | 18 (6.0)   | 37 (12.7)  | -        | 2 (20) |
| Full-time employed                                                             | 177 (59.5) | 165 (56.8) | 10 (91)  | 5 (50) |
| Part-time employed                                                             | 36 (12.1)  | 41 (14.1)  | 1 (9.0)  | 1 (10) |
| Sick Leave                                                                     | 51 (17.1)  | 32 (11.0)  | -        | 2 (20) |
| Retired/early retirement/or similar                                            | 12 (4.0)   | 5 (1.7)    | -        | -      |
| Unemployed                                                                     | 3 (1.0)    | 10 (3.4)   | -        | -      |
| <b>Education (People living with Atraumatic Shoulder Pain)</b>                 |            |            |          |        |
| No vocational education                                                        | 16 (5.3)   | 10 (3.4)   | -        | 2 (20) |
| One or more short courses                                                      | 18 (6.0)   | 2 (0.6)    | -        | -      |
| Short education (Under 1 year)                                                 | 5 (1.6)    | 2 (0.6)    | -        | -      |
| Vocational education (e.g., Hairdresser, Secretary, Craftsman)                 | 65 (21.8)  | 68 (23.4)  | -        | 2 (20) |
| Short Academy Profession Degree (e.g., Police, Multimedia-designer)            | 30 (10.1)  | 25 (8.6)   | -        | 2 (20) |
| Intermediate Academy Profession Degree (e.g., Nurse, Physiotherapist, Teacher) | 70 (23.5)  | 25 (8.6)   | -        | 1 (10) |
| Long Academy Profession Degree (Medical Doctor, Pscyhologist, Engineer)        | 36 (12.1)  | 16 (5.5)   | -        | 1 (10) |

**Table 2. Main themes derived from consultation and collation**

| Main themes derived from consultation and collation                                                                                                                                                                                                                                                                                                                                                                                                                                                                                                                                                                                                                                                                                                                                                                                                                                                                                                                                                                  |                                                                                                                                                                                                                                                                                                                                                                                                                                                                                                                                                                                                                                                                                                                                                                                                                                                                                                                                                   |
|----------------------------------------------------------------------------------------------------------------------------------------------------------------------------------------------------------------------------------------------------------------------------------------------------------------------------------------------------------------------------------------------------------------------------------------------------------------------------------------------------------------------------------------------------------------------------------------------------------------------------------------------------------------------------------------------------------------------------------------------------------------------------------------------------------------------------------------------------------------------------------------------------------------------------------------------------------------------------------------------------------------------|---------------------------------------------------------------------------------------------------------------------------------------------------------------------------------------------------------------------------------------------------------------------------------------------------------------------------------------------------------------------------------------------------------------------------------------------------------------------------------------------------------------------------------------------------------------------------------------------------------------------------------------------------------------------------------------------------------------------------------------------------------------------------------------------------------------------------------------------------------------------------------------------------------------------------------------------------|
| <p><b>Aids</b><br/>Knowledge of which aids are available and the effect of these aids.</p> <p><b>Diagnosis</b><br/>Knowledge of how we can make a diagnosis more precisely and faster for the individual.</p> <p><b>Economy</b><br/>Knowledge of how shoulder pain affects finances for the individual and society.</p> <p><b>Education</b><br/>Knowledge of how more knowledge about shoulder pain can improve patients' progress.</p> <p><b>End-user Involvement</b><br/>Knowledge of how patients can feel more heard by the health professionals and become more involved in their own process.</p> <p><b>Individual</b><br/>Knowledge of how shoulder pain affects the individual's quality of life and time with family.</p> <p><b>Imaging</b><br/>Knowledge of the role of imaging (e.g., MR scanner, ultrasound) in the treatment of shoulder pain.</p> <p><b>Mechanism of Action</b><br/>Knowledge of which mechanisms cause shoulder pain. Prevention - Knowledge of how we can prevent shoulder pain.</p> | <p><b>Patient Journey</b><br/>Knowledge of how the patient process can be improved and made more efficient and how patients can avoid being stigmatised.</p> <p><b>Prognosis</b><br/>Knowledge of how shoulder pain develops and when you can expect improvement/disappearance.</p> <p><b>Research</b><br/>Knowledge of how healthcare professionals can be up to date on the latest research and how patients with shoulder pain can help research.</p> <p><b>Risk Factors</b><br/>Knowledge of which factors put people at risk of developing shoulder pain</p> <p><b>Self-management</b><br/>Knowledge of how patients can best manage their own pain.</p> <p><b>Sleep</b><br/>Knowledge of how sleep affects shoulder pain.</p> <p><b>Treatment</b><br/>Knowledge of how we best treat shoulder pain.</p> <p><b>Work</b><br/>Knowledge of how the job situation affects shoulder pain and how can work be adapted to one's shoulder pain?</p> |

**Table 3. Top 25 Research Questions based on Interim Prioritization**

| No. | Research Question                                                                                                                                                                                                              | Scoring | Corresponding Main Theme   |
|-----|--------------------------------------------------------------------------------------------------------------------------------------------------------------------------------------------------------------------------------|---------|----------------------------|
| 1.  | Which exercise regimen is the most effective for treating people with atraumatic shoulder pain?                                                                                                                                | 95      | Treatment                  |
| 2.  | How can people with atraumatic shoulder pain learn to manage their own pain, and which strategies can facilitate this process?                                                                                                 | 88      | Self-management            |
| 3.  | How effective is painful exercising compared to non-painful exercising for treating people with atraumatic shoulder pain?                                                                                                      | 71      | Treatment                  |
| 4.  | How can atraumatic shoulder pain be prevented?                                                                                                                                                                                 | 69      | Treatment                  |
| 5.  | Which exercise dose is the most effective for treating people with atraumatic shoulder pain?                                                                                                                                   | 69      | Treatment                  |
| 6.  | Who benefits from surgery, and who doesn't?                                                                                                                                                                                    | 63      | Treatment                  |
| 7.  | How can the return-to-previous function be predicted?                                                                                                                                                                          | 62      | Prognosis                  |
| 8.  | What is the effectiveness of passive modalities such as (ultrasound, manual therapy etc.)?                                                                                                                                     | 60      | Treatment                  |
| 9.  | What is the risk of developing post-operative pain, and who develops it?                                                                                                                                                       | 56      | Risk Factors               |
| 10. | Which mechanism is responsible for developing atraumatic shoulder pain?                                                                                                                                                        | 53      | Mechanism of Action        |
| 11. | How can return-to-previous activities be predicted?                                                                                                                                                                            | 53      | Prognosis                  |
| 12. | What is the effectiveness of load management for treating people with atraumatic shoulder pain?                                                                                                                                | 53      | Treatment                  |
| 13. | How can we translate evidence into practice?                                                                                                                                                                                   | 51      | Research                   |
| 14. | How do biological changes (e.g., inflammation, previous injuries, hormones) influence the lived experience?                                                                                                                    | 49      | Mechanism of Action        |
| 15. | Which coping strategies support people with atraumatic shoulder pain in managing their pain?                                                                                                                                   | 48      | Self-management            |
| 16. | What is the effectiveness of shared decision-making, and how can it be ensured that the choice of treatments has been decided based on the alliance between people with atraumatic shoulder pain and healthcare practitioners? | 47      | End-user Involvement       |
| 17. | What is the effectiveness of self-management compared to supervised/group-based rehabilitation?                                                                                                                                | 47      | Treatment                  |
| 18. | How much of improvements in health over time can be attributed to natural healing processes?                                                                                                                                   | 46      | Mechanism of Action        |
| 19. | How does atraumatic shoulder pain influence quality of life (including family life and mental health)?                                                                                                                         | 44      | Mechanism of Action        |
| 20. | How can a return to work be predicted?                                                                                                                                                                                         | 43      | Work                       |
| 21. | How does job adaptability and flexibility influence the prognosis for people with atraumatic shoulder pain?                                                                                                                    | 41      | Work, Prognosis            |
| 22. | How can people with atraumatic shoulder pain and healthcare practitioners be educated to ensure the best management of NTSP?                                                                                                   | 37      | Education                  |
| 23. | What is the mechanism for how impaired sleep can worsen atraumatic shoulder pain symptoms?                                                                                                                                     | 35      | Sleep, Mechanism of Action |
| 24. | How can a good therapeutic alliance be created, and how important is it to the patient journey?                                                                                                                                | 35      | Patient Journey            |
| 25. | What is the effectiveness of patient education for managing atraumatic shoulder pain?                                                                                                                                          | 35      | Education                  |

**\* Score indicates the number of times the questions have been rated very important or important**

**Table 4. Top 10 Prioritized Research Questions**

| Top 10 Research Priorities<br>for Atraumatic Shoulder Pain |                                                                                 | Voting 1        | Voting 2            | Voting 3                         | Voting 4    | Corresponding Theme |
|------------------------------------------------------------|---------------------------------------------------------------------------------|-----------------|---------------------|----------------------------------|-------------|---------------------|
|                                                            |                                                                                 | Place on Top-25 | Workshop 1<br>(HCP) | Workshop 2<br>(ATSP and careers) | Vote Total* |                     |
| 1                                                          | How can we improve the translation of research into clinical practice?          | 13              | 5                   | 4                                | 9           | Research            |
| 2                                                          | How can we prevent atraumatic shoulder pain?                                    | 4               | 4                   | 4                                | 8           | Treatment           |
| 3                                                          | Who benefits from surgery, and who does not?                                    | 6               | 4                   | 2                                | 6           | Treatment           |
| 4                                                          | Which exercise type and dose is the most effective?†                            | 1 and 5         | 4                   | 2                                | 6           | Treatment           |
| 5                                                          | How do patients learn to self-manage their pain, and how can it be facilitated? | 2               | 3                   | 4                                | 7           | Self-management     |
| 6                                                          | Which mechanism(s) is responsible for the development?                          | 10              | 3                   | 3                                | 6           | Mechanism of Action |
| 7                                                          | What is the effect of patient education?                                        | 25              | 1                   | 3                                | 4           | Education           |
| 8                                                          | What is the effect of self-management compared to supervised treatment?         | 17              | 1                   | 2                                | 3           | Self-management     |
| 9                                                          | What is the effectiveness of exercise with pain compared to without pain?       | 3               | 1                   | 1                                | 2           | Treatment           |
| 10                                                         | Which coping strategies support patients in managing their pain?                | 15              | 1                   | 0                                | 1           | Self-management     |

**W = workshop, HCP = healthcare practitioners, ATSP = people with atraumatic shoulder pain**

**\*Votes total is based on the sum of the rating from workshop 1 and 2.**

**† This question were collated based on responses from workshop 1 and 2**
